# Supplementary material
Source: publisher site journal article supplement (https://www.dovepress.com/article/446728)
Supplement: Supplementary file 1 [file get_supplementary_file.php]

| **Supplementary Table 1. Multiple Intubation Attempts (Univariate Analysis).** | | | | |
| --- | --- | --- | --- | --- |
| **Risk Factor** | **Multiple Intubation Attempts** | | **Significance** | **Odds Ratio with 95%** |
|  | **YES (n=26)** | **NO (n=148)** |  | **CI** |
| **Triage** |  |  |  |  |
| Age | 55.53 ± 23.35 | 55.54 ± 21.41 | .999 | - |
| *Systolic Blood Pressure* | 151.71 ± 45.96 | 133.55 ± 32.11 | .019 | - |
| *Heart Rate* | 106.30 ± 34.92 | 93.35 ± 24.82 | .032 | - |
| *SpO2 (%)* | 96.67 ± 6.23 | 96.96 ± 3.51 | .744 | - |
| *Respiratory Rate* | 18.88 ± 44.27 | 18.89 ± 5.50 | .987 | - |
| *GCS* | 8.31 ± 4.87 | 9.68 ± 5.20 | .214 | - |
| *ISS* | 16.68 ± 11.80 | 17.43 ± 17.25 | .834 | - |
| *INR* | 1.14 ± 0.18 | 1.34 ± 0.59 | .103 | - |
| *Shock Index (HR/SBP)* | 0.775 ± 0.35 | 0.735 ± 0.29 | .550 | - |
| **Comorbidity / Risk Factor** | **Presence of Risk Factor** | | **Significance** | **Odds Ratio with 95%** |
|  | **YES** | **NO** |  | **CI** |
| **Demographics** |  |  |  |  |
| *Male* | 18 (13.8%) | 8 (18.2%) | .486 | 0.72 (0.29 - 1.80) |
| *Obese (BMI>30)* | 6 (10.5%) | 20 (17.1%) | .254 | 0.571 (0.22 - 1.51) |
| **Comorbid Conditions** |  |  |  |  |
| *Coronary Artery Disease* | 9 (22%) | 17 (12.9%) | .156 | 1.90 (0.78 – 4.67) |
| *Dementia* | 2 (10%) | 24 (15.7%) | .503 | 0.60 (0.13 – 2.74) |
| *Diabetes* | 8 (21.1%) | 18 (13.3%) | .239 | 1.73 (0.69 - 4.37) |
| *COPD/Asthma* | 5 (14.3%) | 21 (15.2%) | .890 | 0.93 (0.32 - 2.67) |
| **Mode of Injury** |  |  |  |  |
| *Penetrating Injury* | 3 (12%) | 23 (15.4%) | .656 | 0.75 (0.21 - 2.70) |
| *High Impact* | 5 (27.8%) | 21 (13.5%) | .107 | 2.47 (0.80 - 7.65) |
| *Fall* | 16 (17.6%) | 10 (12%) | .306 | 1.42 (0.77 - 2.62) |
| ***Intubation Factors*** |  |  |  |  |
| *Anesthesia* | 6 (12.2%) | 20 (16%) | .532 | 0.73 (0.28 - 1.95) |
| *ED* | 15 (15%) | 11 (14.9%) | .980 | 1.011 (0.44 - 2.35) |
| *EMS* | 5 (20%) | 21 (14.1%) | .443 | 1.54 (0.52 - 4.50) |
| *Video Laryngoscope* | 8 (30.8%) | 18 (12.7%) | .003 | 0.55 (0.28 - 1.08) |
| **Other factors** |  |  |  |  |
| *Anti-thrombotic* | 5 (19.2%) | 21 (14.2%) | .506 | 1.44 (0.49 - 4.24) |
| *INR Elevated* | 4 (8.9%) | 22 (17.1%) | .186 | 0.48 (0.15 – 1.46) |
|  |  |  |  |  |

| **Supplementary Table 2. Death (Univariate Analysis).** | | | | |
| --- | --- | --- | --- | --- |
| **Risk Factor** | **Death** | | **Significance** | **Odss Ratio with 95%** |
|  | **YES (n=71)** | **NO (n=103)** |  | **CI** |
| **Triage** |  |  |  |  |
| Age | 59.39 ± 24.51 | 52.6 ± 19.6 | .046 | - |
| *Systolic Blood Pressure* | 141.06 ± 42.63 | 134.01± 30.5 | .239 | - |
| *Heart Rate* | 96.02 ± 31.01 | 95.1 ± 24.5 | .842 | - |
| *SpO2 (%)* | 95.90 ± 5.46 | 97.41 ± 3.00 | .03 | - |
| *Respiratory Rate* | 18.31 ± 4.46 | 19.20 ± 5.73 | .327 | - |
| *GCS* | 7.46 ± 5.21 | 10.82 ± 4.7 | .001 | - |
| *ISS* | 20.77 ± 20.69 | 15.11 ± 12.5 | .033 | - |
| *INR* | 1.53 ± 0.703 | 1.20 ± 0.42 | .001 | - |
| *Shock Index(HR/SBP)* | 0.83 ± 0.1 | 0.74 ± 0.29 | .347 | - |
| **Comorbidity / Risk Factor** | **Presence of Risk Factor** | | **Significance** | **Odss Ratio with 95%** |
|  | **YES** | **NO** |  | **CI** |
| **Demographics** |  |  |  |  |
| *Male* | 51 (39.5%) | 20 (45.5%) | .491 | 0.79 (0.39 - 1.57) |
| *Obese (BMI>30)* | 23 (41.1%) | 48 (41%) | .995 | 1.00 (0.52 - 1.91) |
| **Comorbid Conditions** |  |  |  |  |
| *Coronary Artery Disease* | 20 (48.8%) | 50 (38.2%) | .227 | 1.54 (0.76-3.13) |
| *Dementia* | 6 (30%) | 64 (42.150 | .300 | 0.59 (0.22-1.62) |
| *Diabetes* | 14 (37.8%) | 56 (41.5%) | .689 | 0.86 (0.41 - 1.81) |
| *COPD/Asthma* | 14 (40%) | 56 (40.9%) | .925 | 0.96 (0.45 - 2.06) |
| **Mode of Injury** |  |  |  |  |
| *Penetrating Injury* | 13 (52%) | 58 (39.2%) | .228 | 1.68 (0.72-3.94) |
| *High Impact* | 6 (33.3%) | 65 (41.9%) | .483 | 0.69 (0.25-1.94) |
| *Fall* | 41 (45.1%) | 30 (36.6%) | .258 | 1.42 (0.77 - 2.62) |
| ***Intubation Factors*** |  |  |  |  |
| *Anesthesia* | 20 (41.7%) | 51 (40.8%) |  | 1.04 (0.53 – 2.04) |
| *ED* | 31 (31.0%) | 40 (54.8%) | .002 | 0.37 (0.20 – 0.69) |
| *EMS* | 20 (80%) | 51 (34.5%) | .001 | 7.61 (2.70-21.46) |
| *Multiple Intubation Attempts* | 13 (50%) | 58 (39.5%) | .314 | 1.53 (0.67 - 3.54) |
| *Video Laryngoscope* | 6 (18.2%) | 65 (46.4%) | .003 | 0.26 (0.10- 0.66) |
| **Other factors** |  |  |  |  |
| *Anti-thrombotic* | 14 (56%) | 57 (38.5%) | 0.1 | 2.03 (0.86 -4.78) |
| *INR Elevated* | 35 (77.8%) | 36 (28.1%) | .001 | 8.94 (4.01 - 19.94) |

| **Supplementary Table 3. ICU Admission (Univariate Analysis).** | | | | |
| --- | --- | --- | --- | --- |
| **Risk Factor** | **ICU Admission** | | **Significance** | **Odds Ratio with 95%** |
|  | **YES (n=114)** | **NO (n=60)** |  | **CI** |
| **Triage** |  |  |  |  |
| Age | 59.78 ± 21.24 | 47.5 ± 21.18 | .001 | - |
| *Systolic Blood Pressure* | 139.91 ± 35.74 | 126.8 ± 31.6 | .038 | - |
| *Heart Rate* | 95.03 ± 26.46 | 95.9 ± 28.04 | .86 | - |
| *SpO2 (%)* | 96.74 ± 4.37 | 97.40 ± 2.86 | .38 | - |
| *Respiratory Rate* | 19.06 ± 5.5 | 18.44 ± 4.79 | .52 | - |
| *GCS* | 10.56 ±4.73 | 7.40 ± 5.36 | .001 | - |
| *ISS* | 17.24 ± 11.92 | 17.5 ± 22.9 | .93 | - |
| *INR* | 1.32 ± 0.59 | 1.27 ± 0.42 | .61 | - |
| *Shock Index(HR/SBP)* | 0.77 ± 0.55 | 0.79 ± 0.30 | .78 | - |
| **Comorbidity / Risk Factor** | **Presence of Risk Factor** | | **Significance** | **Odds Ratio with 95%** |
|  | **YES** | **NO** |  | **CI** |
| **Demographics** |  |  |  |  |
| *Male* | 80 (61.5%) | 34 (77.3%) | .058 | 0.47 (0.21 - 1.04) |
| *Obese (BMI>30)* | 34 (59.6%) | 80 (68.4%) | .256 | 0.68 (0.35 - 1.32) |
| **Comorbid Conditions** |  |  |  |  |
| *Coronary Artery Disease* | 35 (85.4%) | 79 (59.8%) | .003 | 3.91 (1.54 - 9.95) |
| *Dementia* | 19 (95%) | 95(62.1%) | .004 | 11.6 (1.51 - 88.96) |
| *Diabetes* | 33 (86.8%) | 81 (60%) | .002 | 4.40 (1.62 - 11.98) |
| *COPD/Asthma* | 26 (74.3%) | 88 (63.8%) | .241 | 1.64 (0.71 - 3.78) |
| **Mode of Injury** |  |  |  |  |
| *Penetrating Injury* | 10 (40%) | 104 (69.8%) | .004 | 0.29 (0.12 - 0.69) |
| *High Impact* | 10 (59.8%) | 104 (66.7%) | .348 | 0.63 (0.23 - 1.68) |
| *Fall* | 72 (79.1%) | 42 (50.6%) | .001 | 3.70 (1.91 - 7.19) |
| ***Intubation Factors*** |  |  |  |  |
| *Anesthesia* | 43 (87.8%) | 71 (56.8%) | .001 | 5.45 (2.16 – 13.74) |
| *ED* | 63 (63%) | 51 (68.9%) | .417 | 0.77 (0.41– 1.45) |
| *EMS* | 8 (32%) | 106 (71.1%) | .001 | 0.19 (0.077 - 0.48) |
| *Multiple Intubation Attempts* | 24 (92.3%) | 90 (60.8%) | .002 | 7.73 (1.76 - 33.96) |
| *Video Laryngoscope* | 28 (84.8%) | 86 (61%) | .009 | 3.58 (1.30 – 9.83) |
| **Other factors** |  |  |  |  |
| *Anti-thrombotic* | 20 (76.9%) | 94 (63.5%) | .185 | 1.92 (0.73 - 5.06) |
| *INR Elevated* | 17 (37.8%) | 97 (75.2%) | .001 | 0.20 (0.10 - 0.41) |

| **Supplementary Table 4. Prolonged Ventilation (Univariate Analysis).** | | | | | | | |
| --- | --- | --- | --- | --- | --- | --- | --- |
| **Risk Factor** | | **Prolonged Ventilation** | | | **Significance** | | **Odds Ratio with 95%** |
|  | | **YES (n=80)** | **NO (n=94)** | |  | | **CI** |
| **Triage** | |  |  | |  | |  |
| Age | | 62.05 ± 20.75 | 50.00 ± 21.54 | | .001 | | - |
| *Systolic Blood Pressure* | | 137.34 ± 33.18 | 135.3 ± 37.16 | | .722 | | - |
| *Heart Rate* | | 94.21 ± 28.47 | 96.4 ± 25.10 | | .619 | | - |
| *SpO2 (%)* | | 97.30 ± 3.05 | 96.50 ± 4.86 | | .219 | | - |
| *Respiratory Rate* | | 19.36 ± 5.96 | 18.40 ± 4.52 | | .259 | | - |
| *GCS* | | 10.76 ± 4.95 | 8.37 ± 5.12 | | .002 | | - |
| *ISS* | | 17.85 ± 12.14 | 16.89 ± 19.4 | | .715 | | - |
| *INR* | | 1.38 ± 0.68 | 1.23 ± 0.36 | | .093 | | - |
| *Shock Index (HR/SBP)* | | 0.72 ± 0.25 | 0.83 ± 0.67 | | .150 | | - |
| **Comorbidity / Risk Factor** | | **Presence of Risk Factor** | | | **Significance** | | **Odds Ratio with 95%** |
|  | | **YES** | **NO** | |  | | **CI** |
| **Demographics** | |  |  | |  | |  |
| *Male* | | 55 (42.3%) | 25 (56.8%) | | .950 | | 0.56 (0.28 - 1.11) |
| *Obese (BMI>30)* | | 25 (43.9%) | 55 (47%) | | .701 | | 0.88 (0.47 - 1.67) |
| **Comorbid Conditions** | |  |  | |  | |  |
| *Coronary Artery Disease* | | 26 (63.4%) | 54 (40.9%) | | .011 | | 4.06 (1.41 - 11.74) |
| *Dementia* | | 15 (75%) | 65 (42.5%) | | .01 | | 1.24 (0.81 - 1.89) |
| *Diabetes* | | 22 (57.9%) | 58 (43%) | | .10 | | 1.83 (0.88 - 3.78) |
| *COPD/Asthma* | | 20 (57.1%) | 60 (43.5%) | | .15 | | 1.73 (0.82 - 3.67) |
| **Mode of Injury** | |  |  | |  | |  |
| *Penetrating Injury* | | 6 (24%) | 74 (49.7%) | | .02 | | 0.32 (0.12 - 0.85) |
| *High Impact* | | 6 (33.3%) | 74 (47.4%) | | .260 | | 0.55 (0.20 - 1.55) |
| *Fall* | | 47 (51.6%) | 33 (39.8%) | | .120 | | 1.62 (0.89 - 2.96) |
| **Intubation Factors** | |  |  | |  | |  |
| *Anesthesia* | | 33 (67.3%) | 47 (37.6%) | | .001 | | 3.42 (1.70 – 6.88) |
| *ED* | | 42 (42.0%) | 38 (51.4%) | | .221 | | 0.69 (0.38 – 1.26) |
| *EMS* | | 5 (20%) | 75 (50.3%) | |  | | 0.25 (0.09-0.69) |
| *Multiple Intubation Attempts* | | 13 (50%) | 67 (45.3%) | | .655 | | 1.21 (0.53 - 2.68) |
| *Video Laryngoscope* | | 20 (60.6%) | 60 (42.6%) | | .061 | | 2.08(0.96 – 4.50) |
| **Other factors** |  |  | |  | |  | |
| *Anti-thrombotic* | | 16 (61.5%) | 64 (43.2%) | | 0.08 | | 2.10 (0.89 - 4.94) |
| *INR Elevated* | | 15 (33.3%) | 65 (50.4%) | | 0.048 | | 0.49 (0.24 -1.00) |

| **Supplementary Table 5. Abbreviate Injury Scale Medians (k-test).** | | | |
| --- | --- | --- | --- |
| **Outcome** | **Multiple Intubation Attempts** | | **Significance** |
|  | **YES (n=26)** | **NO (n=148)** |  |
| **AIS** | **Median (IQR)** |  |  |
| *Head & Neck* | 4.5 (5) | 3 (5) | .131 |
| *Face* | 0 (0) | 0 (0) | .870 |
| *Chest* | 0 (0) | 0 (0) | .319 |
| *Abdomen/Pelvis* | 0 (0) | 0 (0) | .768 |
| *External* | 1 (1) | 1 (1) | .532 |
|  | **Death** | | **Significance** |
|  | **YES (n=71)** | **NO (n=103)** |  |
| *Head & Neck* | 3 (5) | 3 (5) | .506 |
| *Face* | 0 (0) | 0 (0) | .082 |
| *Chest* | 0 (0) | 0 (0.25) | .596 |
| *Abdomen/Pelvis* | 0 (0) | 0 (0) | .650 |
| *External* | 0.5 (1) | 1 (1) | .374 |
|  | **ICU Admission** | | **Significance** |
|  | **YES (n=114)** | **NO (n=60)** |  |
| *Head & Neck* | 3 (5) | 2 (9) | .651 |
| *Face* | 0 (0) | 0 (0) | .956 |
| *Chest* | 0 (0) | 0 (0) | .916 |
| *Abdomen/Pelvis* | 0 (0) | 0 (0) | .623 |
| *External* | 1 (1) | 1 (1) | .974 |
|  | **Prolonged Ventilation (>/=3 days)** | | **Significance** |
|  | **YES (n=80)** | **NO (n=94)** |  |
| *Head & Neck* | 3 (5) | 3 (5) | .364 |
| *Face* | 0 (0) | 0 (0) | .218 |
| *Chest* | 0 (2) | 0 (0) | .013 |
| *Abdomen/Pelvis* | 0 (0) | 0 (0) | .827 |
| *External* | 1 (1) | 1 (1) | .376 |
